# Supplementary material for: Ball milling for the quantitative and specific solvent-free Knoevenagel condensation + Michael addition cascade in the synthesis of various 2-amino-4-aryl-3-cyano-4H-chromenes without heating
Source: Royal Society of Chemistry journal article supplement (doi:10.1039/c4ra06603k), 2014-01-01
Supplement: c4ra06603k1.pdf [file c4ra06603k1.pdf]

## Electronic Supplementary Information

Representative spectral data for:

### **Ball milling for the quantitative and specific solvent-free Knoevenagel condensation + Michael addition cascade in the synthesis of various 2-amino-4-aryl-3-cyano-4*H*-chromenes without heating**

Omid Hosseinchi Qareaghaj<sup>a</sup>, Sara Mashkouri<sup>a</sup>, M. Reza Naimi-Jamal<sup>a\*</sup>, Gerd Kaupp<sup>b</sup>

---

<sup>a</sup> *Research Laboratory of Green Organic Synthesis and Polymers, Department of Chemistry, Iran University of Science and Technology, 16846 Tehran, Iran.  
E-mail address: naimi@iust.ac.ir (M. R. Naimi-Jamal).*

<sup>b</sup> *Faculty 5, Department of Chemistry, University of Oldenburg, 26188 Edewecht, Germany.*

A 1H NMR in DMSO at 298 K

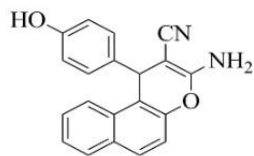

1H NMR in DMSO

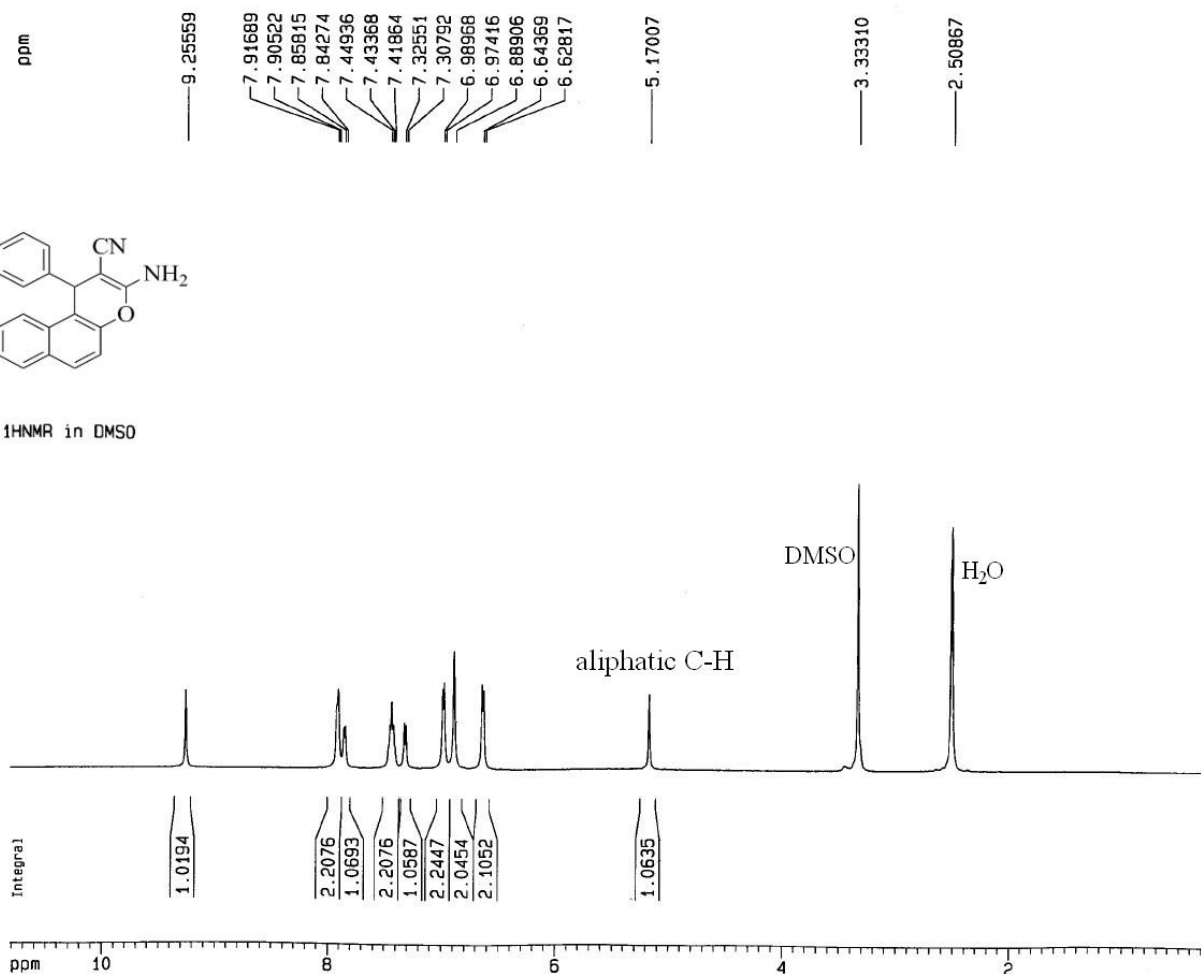

```

INSTRUM      spect
PROBHD      5 mm QNP 1H/13
PULPROG      zg30
TD          32768
SOLVENT      DMSO
NS           16
DS           1
SWH         10330.578 Hz
FIDRES      0.315264 Hz
AQ          1.5860696 sec
RG           574.7
DW          48.400 usec
DE           6.50 usec
TE           298.0 K
D1           5.0000000 sec
MCREST      0.0000000 sec
MCWFK       0.0150000 sec
    
```

```

***** CHANNEL f1 *****
NUC1         1H
P1           10.50 usec
PL1          -3.00 dB
SF01        500.1330885 MHz
    
```

```

F2 - Processing parameters
SI           32768
SF           500.1300000 MHz
WDW          EM
SSB          0
LB           0.30 Hz
GB           0
PC           1.00
    
```

```

1D NMR plot parameters
CX           20.00 cm
CY           4.82 cm
F1P         10.809 ppm
F1           5405.97 Hz
F2P         0.251 ppm
F2           125.38 Hz
PPMCM       0.52792 ppm/cm
HZCM        264.02930 Hz/cm
    
```

A <sup>1</sup>H NMR in DMSO at 298 K

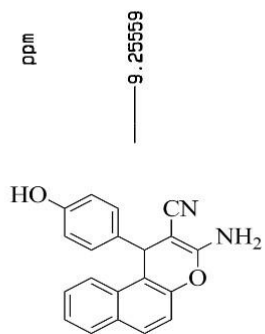

<sup>1</sup>H NMR in DMSO

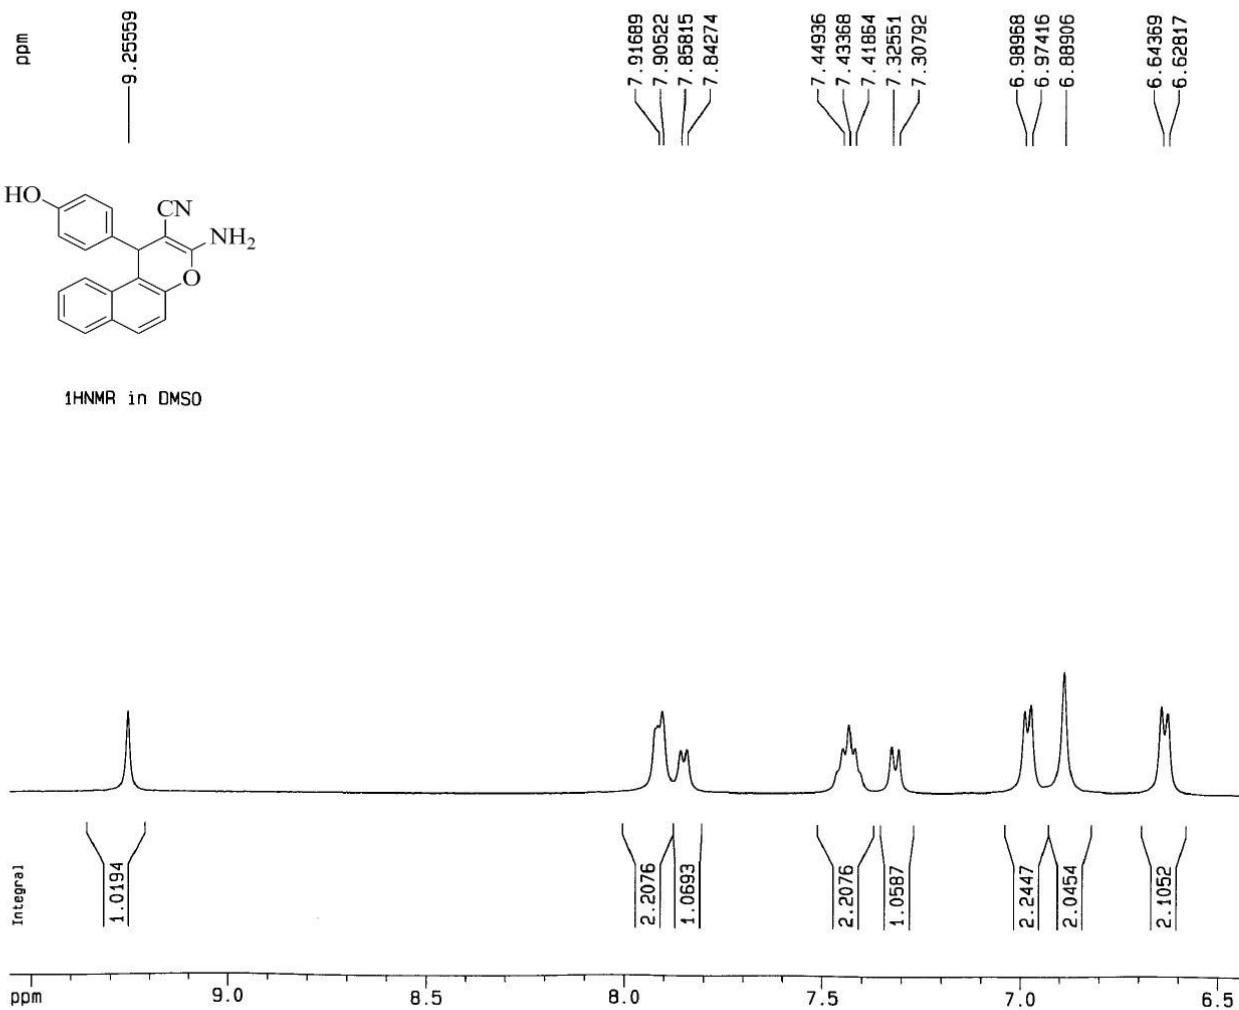

INSTRUM spect  
PROBHD 5 mm QNP 1H/13  
PULPROG zg30  
TD 32768  
SOLVENT DMSO  
NS 16  
DS 1  
SWH 10330.578 Hz  
FIDRES 0.315264 Hz  
AQ 1.5860696 sec  
RG 574.7  
DM 48.400 usec  
DE 6.50 usec  
TE 298.0 K  
D1 5.0000000 sec  
MCREST 0.0000000 sec  
MCWAK 0.0150000 sec

===== CHANNEL f1 =====  
NUC1 1H  
P1 10.50 usec  
PL1 -3.00 dB  
SF01 500.1330885 MHz

F2 - Processing parameters  
SI 32768  
SF 500.1300000 MHz  
WDW EM  
SSB 0  
LB 0.30 Hz  
GB 0  
PC 1.00

1D NMR plot parameters  
CX 20.00 cm  
CY 4.82 cm  
F1P 9.554 ppm  
F1 4778.32 Hz  
F2P 6.411 ppm  
F2 3206.39 Hz  
PPMCM 0.15715 ppm/cm  
HZCM 78.59666 Hz/cm

P-OH+B 13CNMR in DMSO at 298 K

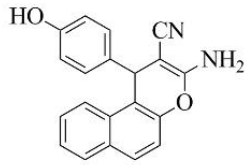

13CNMR in DMSO

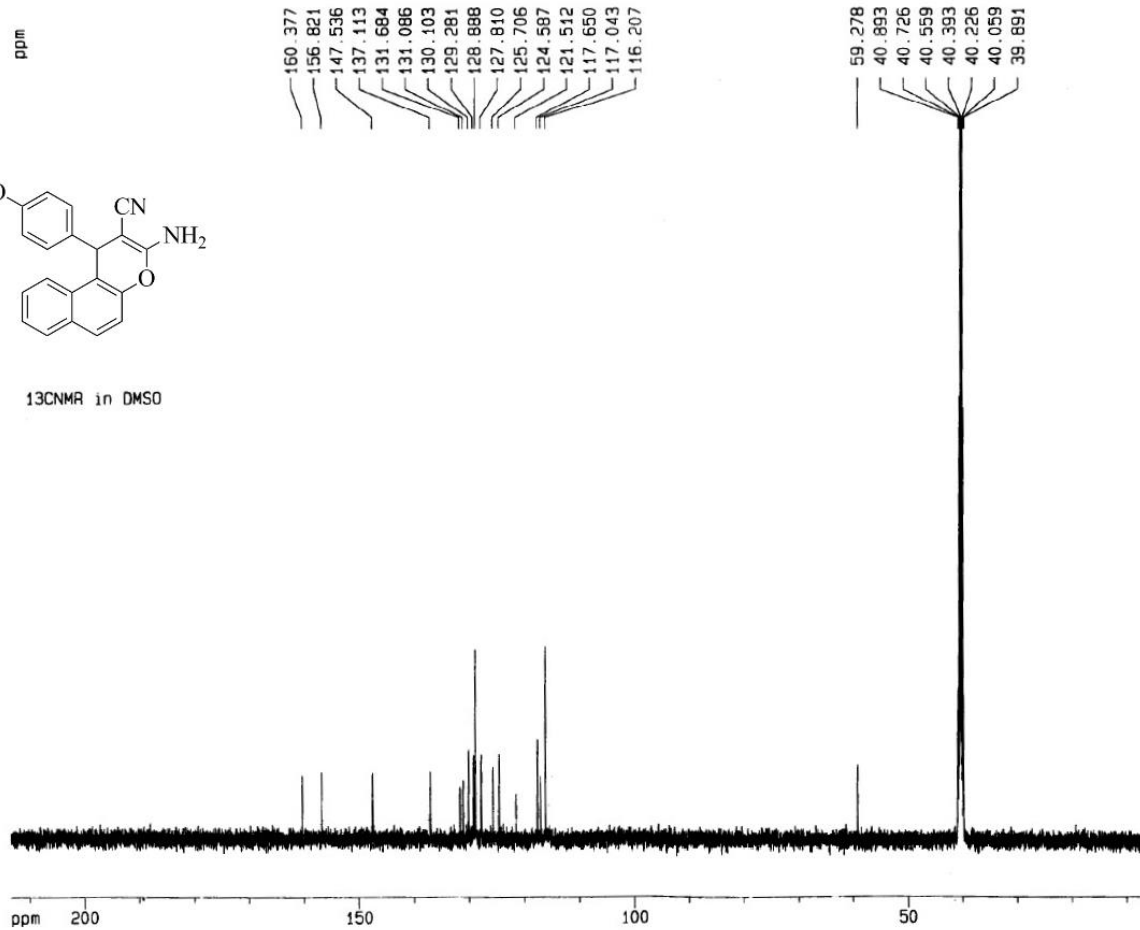

160.377  
156.821  
147.536  
137.113  
131.684  
131.086  
130.103  
129.281  
128.888  
127.810  
125.706  
124.587  
121.512  
117.650  
117.043  
116.207

59.278  
40.893  
40.726  
40.559  
40.393  
40.226  
40.059  
39.891

```

INSTRUM spect
PROBHD 5 mm QNP 1H/13
PULPROG zgpg30
TD 65536
SOLVENT DMSO
NS 430
DS 4
SWH 30030.029 Hz
FIDRES 0.456222 Hz
AQ 1.0912410 sec
RG 6502
DM 16.650 usec
DE 6.50 usec
TE 298.2 K
D1 1.00000000 sec
d11 0.03000000 sec
DELTA 0.89999998 sec
MCREST 0.00000000 sec
MCHWK 0.01500000 sec
    
```

```

----- CHANNEL f1 -----
NUC1 13C
P1 9.10 usec
PL1 3.00 dB
SF01 125.7703643 MHz
    
```

```

----- CHANNEL f2 -----
CPOPRG2 waltz16
NUC2 1H
PCPD2 80.00 usec
PL2 0.00 dB
PL12 15.50 dB
PL13 15.50 dB
SF02 500.1320005 MHz
    
```

```

F2 - Processing parameters
SI 32768
SF 125.7577390 MHz
WDW EM
SSB 0
LB 1.00 Hz
GB 0
PC 1.40
    
```

```

1D NMR plot parameters
CX 20.00 cm
CY 18.30 cm
F1P 213.506 ppm
F1 26850.06 Hz
F2P 6.134 ppm
F2 771.34 Hz
PPMCM 10.36863 ppm/cm
HZCM 1303.93555 Hz/cm
    
```

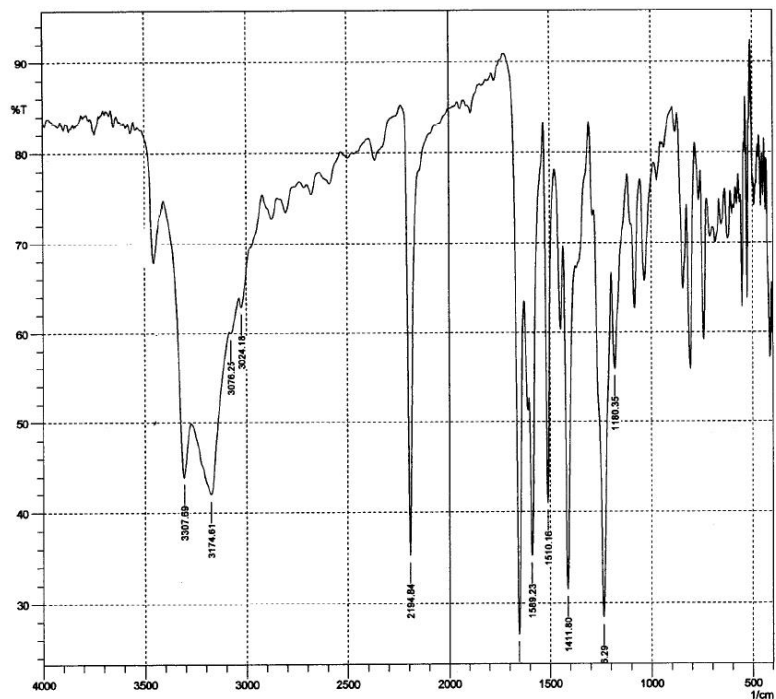

|         |        |        |         |         |        |        |
|---------|--------|--------|---------|---------|--------|--------|
| 1180.35 | 55.865 | 12.914 | 1105.78 | 1118.64 | 13.684 | 2.681  |
| 1236.29 | 28.418 | 41.294 | 1282.57 | 1197.71 | 26.517 | 13.301 |
| 1411.8  | 31.532 | 37.207 | 1433.01 | 1375.15 | 16.835 | 7.292  |
| 1510.16 | 41.011 | 40.315 | 1529.45 | 1477.37 | 10.517 | 5.615  |
| 1589.23 | 35.239 | 23.082 | 1602.74 | 1531.37 | 15.455 | 3.333  |
| 1652.88 | 26.584 | 44.328 | 1720.39 | 1627.81 | 18.599 | 8.394  |
| 2194.84 | 35.305 | 49.415 | 2235.34 | 2069.48 | 22.838 | 10.406 |
| 3024.18 | 62.893 | 2.161  | 3035.75 | 2920.03 | 18.674 | 0.479  |
| 3076.25 | 60.008 | 0.777  | 3083.96 | 3037.68 | 9.764  | 0.181  |
| 3174.61 | 42.015 | 13.261 | 3272.98 | 3085.89 | 58.772 | 9.939  |
| 3307.69 | 43.945 | 12.139 | 3406.05 | 3274.9  | 30.782 | 3.497  |
| 3452.34 | 48.978 | 29.125 | 3512.13 | 3407.98 | 15.941 | 5.011  |

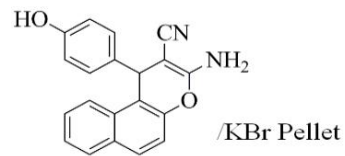

Comment;

No. of Scans;  
Resolution;

A4 1HNMR in DMSO at 298 K

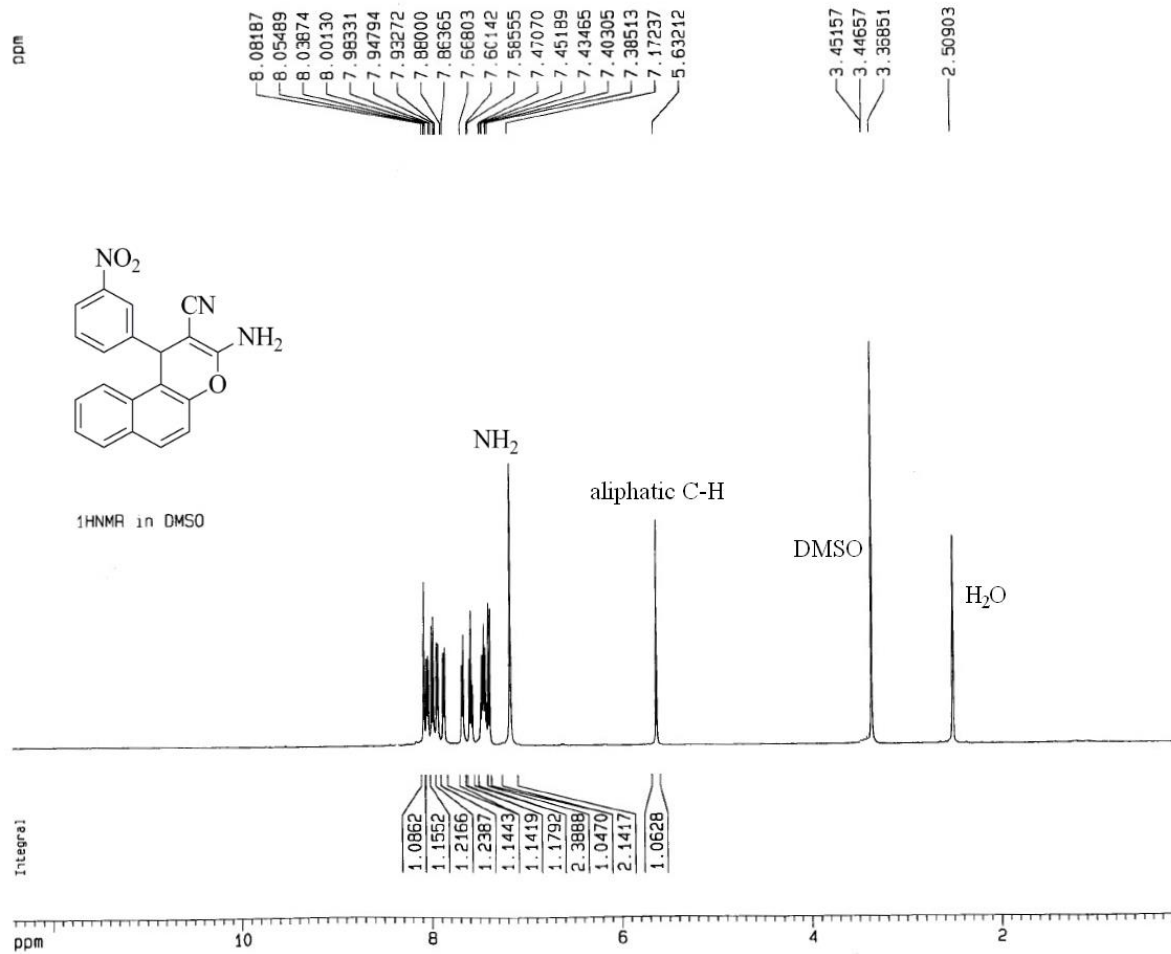

----- CHANNEL f1 -----  
NUC1 1H  
P1 10.50 usec  
PL1 -3.00 dB  
SF01 500.1330885 MHz

F2 - Processing parameters  
SI 32768  
SF 500.1300000 MHz  
WDW EM  
SSB 0  
LB 0.30 Hz  
GB 0  
PC 1.00

1D NMR plot parameters  
CX 20.00 cm  
CY 6.93 cm  
F1P 12.426 ppm  
F1 6214.87 Hz  
F2P 0.151 ppm  
F2 75.42 Hz  
PPMCM 0.61378 ppm/cm  
HZCM 305.97226 Hz/cm

A4 1HNMR in DMSO at 298 K

ppm  
8.08187  
8.05489  
8.03874  
8.00130  
7.98331  
7.94794  
7.93272  
7.88000  
7.86365

7.68342  
7.66803  
7.60142  
7.58555  
7.56980  
7.48380  
7.47070  
7.45189  
7.43465  
7.42095  
7.40305  
7.38513

7.17237

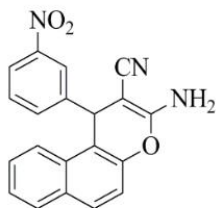

1HNMR in DMSO

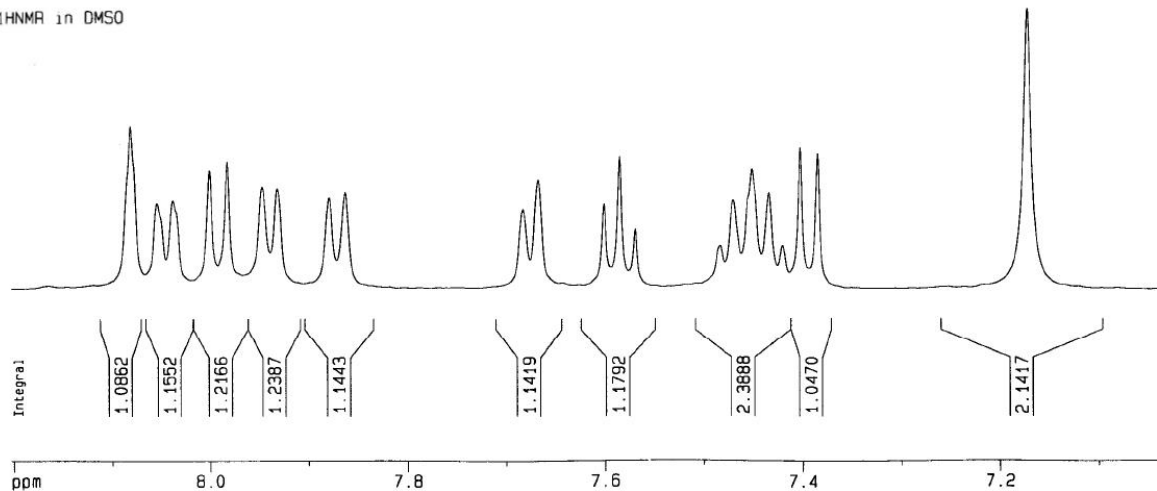

INSTRUM spect  
PROBHD 5 mm QNP 1H/13  
PULPROG zg30  
TD 32768  
SOLVENT DMSO  
NS 16  
DS 1  
SWH 10330.578 Hz  
FIDRES 0.315264 Hz  
AQ 1.5860596 sec  
RG 287.4  
DW 48.400 usec  
DE 6.50 usec  
TE 294.6 K  
D1 5.00000000 sec  
MCREST 0.00000000 sec  
MCWRK 0.01500000 sec

===== CHANNEL f1 =====  
NUC1 1H  
P1 10.50 usec  
PL1 -3.00 dB  
SFO1 500.1330985 MHz

F2 - Processing parameters  
SI 32768  
SF 500.1300000 MHz  
WDW EM  
SSB 0  
LB 0.30 Hz  
GB 0  
PC 1.00

1D NMR plot parameters  
CX 20.00 cm  
CY 6.93 cm  
F1P 8.203 ppm  
F1 4102.42 Hz  
F2P 7.028 ppm  
F2 3514.86 Hz  
PPMCM 0.05874 ppm/cm  
HZCM 29.37802 Hz/cm

<sup>13</sup>CNMR in DMSO at 298 K

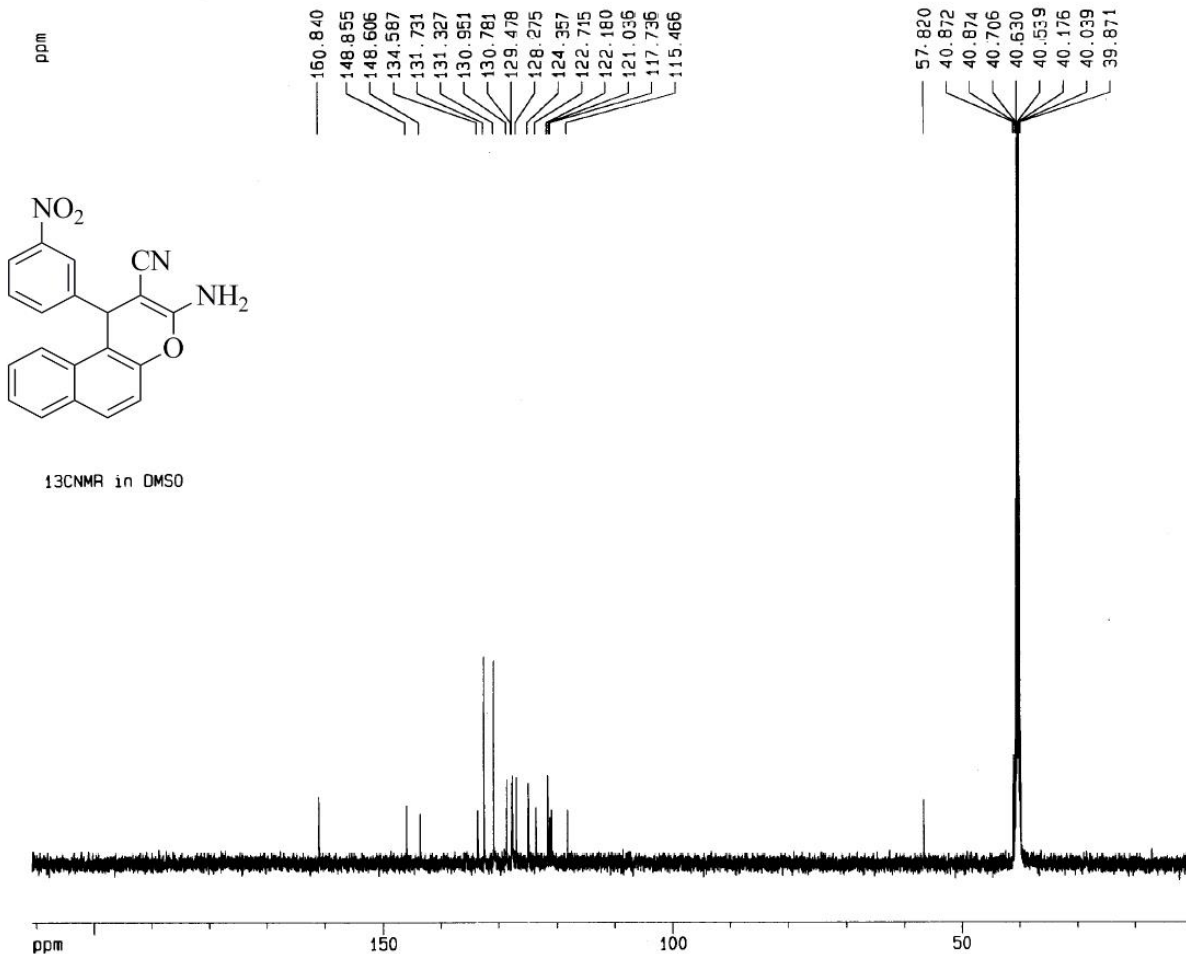

```
INSTRUM spect
PROBHD 5 mm QNP 1H/13
PULPROG zgpg30
TD 32768
SOLVENT DMSO
NS 746
DS 4
SMH 30030.029 Hz
FIDRES 0.916444 Hz
AQ 0.5456539 sec
RG 5792.5
DM 16.650 usec
DE 6.50 usec
TE 294.3 K
D1 1.00000000 sec
d11 0.03000000 sec
DELTA 0.89999998 sec
MCREST 0.00000000 sec
MCWRK 0.01500000 sec
```

```
----- CHANNEL f1 -----
NUC1 13C
P1 9.10 usec
PL1 3.00 dB
SFO1 125.7703643 MHz
```

```
----- CHANNEL f2 -----
CPDPRG2 waltz16
NUC2 1H
PCPD2 80.00 usec
PL2 0.00 dB
PL12 15.50 dB
PL13 15.50 dB
SFO2 500.1320005 MHz
```

```
F2 - Processing parameters
SI 32768
SF 125.7577390 MHz
WDW EM
SSB 0
LB 1.00 Hz
GB 0
PC 1.40
```

```
1D NMR plot parameters
CX 20.00 cm
CY 14.88 cm
F1P 210.626 ppm
F1 26487.85 Hz
F2P 9.537 ppm
F2 1199.41 Hz
PPMCM 10.05443 ppm/cm
HZCM 1264.42236 Hz/cm
```



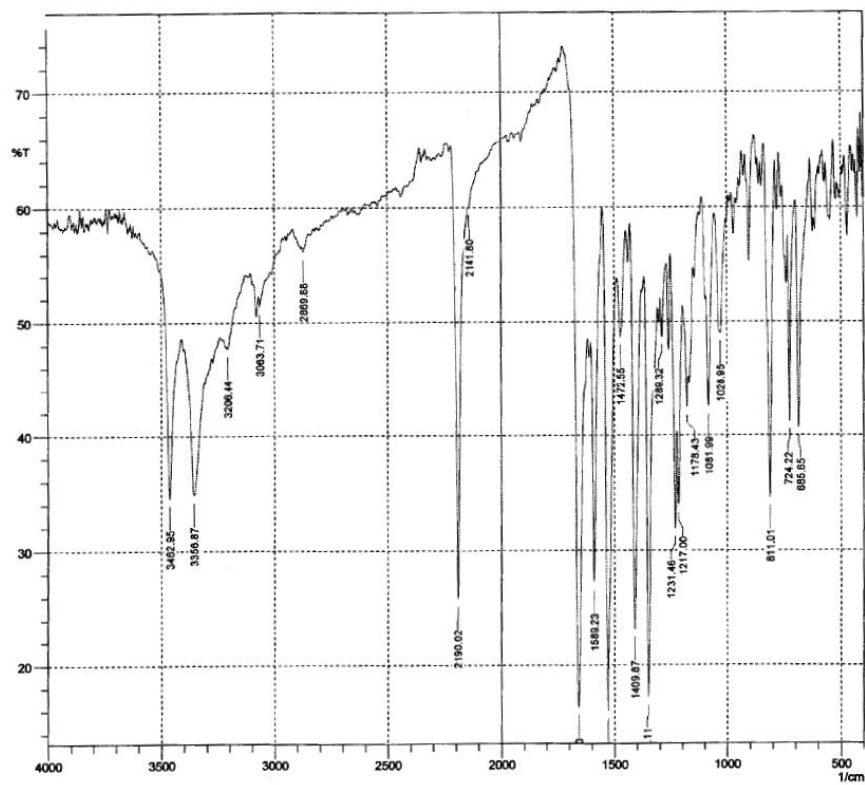

|         |        |        |         |         |        |        |
|---------|--------|--------|---------|---------|--------|--------|
| 685.65  | 40.691 | 19.27  | 697.22  | 655.75  | 12.063 | 2.733  |
| 724.22  | 41.229 | 16.708 | 731.94  | 701.08  | 8.538  | 1.428  |
| 811.01  | 34.546 | 30.026 | 836.08  | 788.83  | 14.009 | 5.042  |
| 1028.95 | 48.976 | 10.168 | 1054.03 | 1006.77 | 12.737 | 1.963  |
| 1081.99 | 42.604 | 11.528 | 1091.63 | 1054.99 | 10.671 | 1.414  |
| 1178.43 | 42.448 | 4.175  | 1196.75 | 1172.64 | 7.925  | 0.274  |
| 1217    | 33.954 | 9.23   | 1223.75 | 1197.71 | 9.843  | 1.006  |
| 1231.46 | 31.892 | 12.268 | 1250.75 | 1224.71 | 9.878  | 1.35   |
| 1289.32 | 48.687 | 4.081  | 1296.08 | 1270.04 | 7.385  | 0.319  |
| 1349.11 | 17.243 | 35.756 | 1367.44 | 1308.61 | 24.934 | 8.451  |
| 1409.87 | 23.114 | 33.183 | 1429.15 | 1379.97 | 20.083 | 7.521  |
| 1472.55 | 48.726 | 6.67   | 1487.98 | 1448.44 | 11.099 | 1.102  |
| 1528.48 | 18.039 | 41.679 | 1550.66 | 1488.94 | 26.492 | 11.291 |
| 1589.23 | 27.311 | 23.887 | 1602.74 | 1551.63 | 18.049 | 4.271  |
| 1657.7  | 16.349 | 43.544 | 1693.38 | 1618.17 | 31.32  | 13.644 |
| 2141.8  | 60.034 | 0.161  | 2143.73 | 2102.26 | 8.676  | 0.009  |
| 2190.02 | 25.851 | 37.426 | 2218.95 | 2143.73 | 22.77  | 7.46   |
| 2869.88 | 56.2   | 0.705  | 2877.6  | 2845.77 | 7.783  | 0.07   |
| 3063.71 | 51.43  | 1.128  | 3070.46 | 3038.64 | 8.883  | 0.114  |
| 3206.44 | 47.734 | 0.339  | 3208.36 | 3175.58 | 10.049 | 0.066  |
| 3356.87 | 34.875 | 11.48  | 3398.34 | 3309.62 | 34.503 | 4.767  |
| 3462.95 | 34.626 | 17.432 | 3502.49 | 3409.91 | 61.781 | 5.101  |

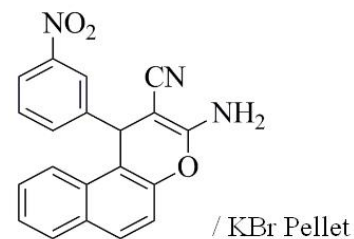

Comment;

No. of Scans;  
Resolution;

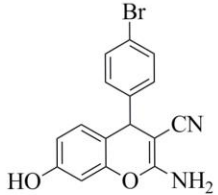

in DMSO-d6

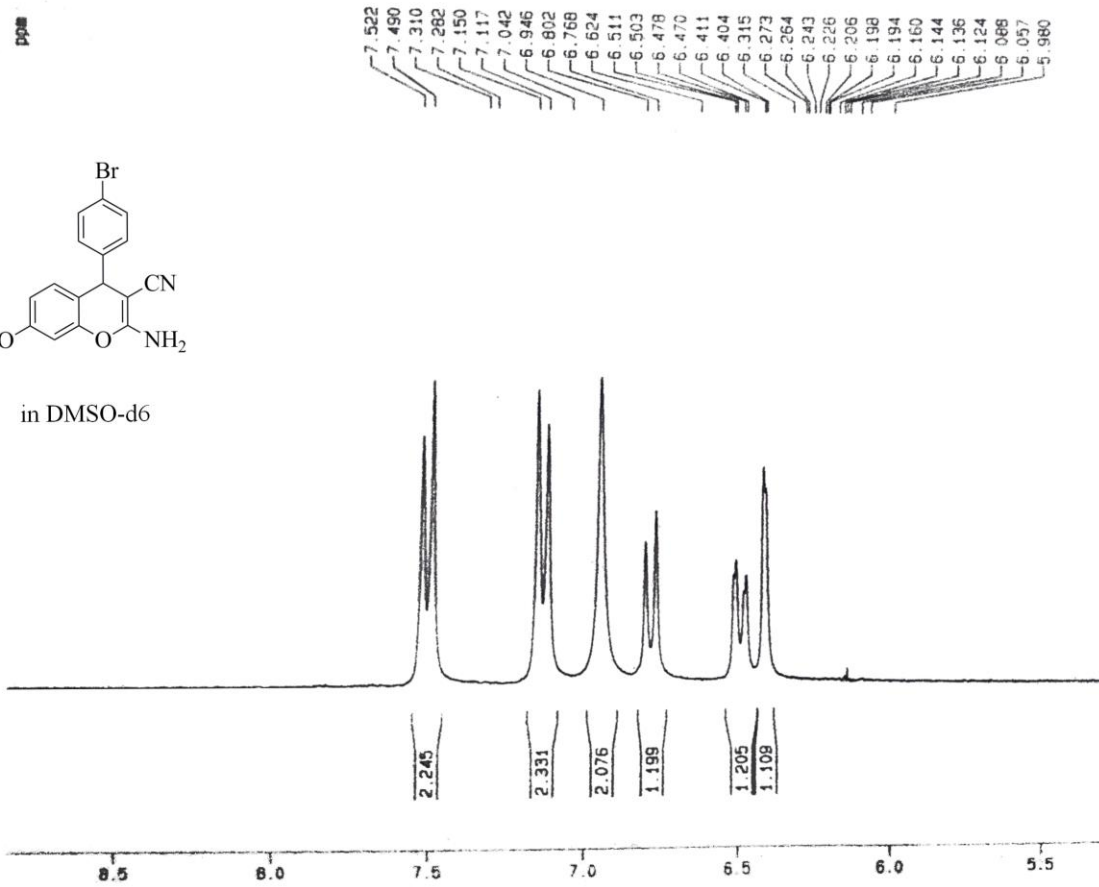

F2 - Acquisition Parameters  
 Date\_ 20131203  
 Time 9.45  
 INSTRUM spect  
 PROBRD 5 mm QNP 1H/1  
 PULPROG zg  
 TD 65536  
 SOLVENT DMSO  
 NS 18  
 DS 2  
 SSB 6265.864 Hz  
 FIDRES 0.095606 Hz  
 AQ 5.2298226 sec  
 RG 40.3  
 DW 79.800 usec  
 DE 6.00 usec  
 TE 300.0 K  
 SI 1.0000000 sec

===== CHANNEL f1 =====  
 NUC1 1H  
 P1 10.50 usec  
 PL1 -4.00 dB  
 SFO1 250.1300024 MHz  
 F2 - Processing parameters  
 SI 32768  
 SF 250.1300024 MHz  
 NSW 136  
 SSB 0  
 LB 0.30 Hz  
 GB 0  
 PC 1.00

1D NMR plot parameters  
 CX 20.00 cm  
 F1P 6.828 ppm  
 F1 2208.23 Hz  
 F2P 6.290 ppm  
 F2 1329.21 Hz  
 PPMCH 0.17691 ppm/cm  
 -QCN 44.25126 Hz/cm
